# Supplementary material for: Structural, thermal, dielectric and phonon properties of perovskite-like imidazolium magnesium formate
Source: Royal Society of Chemistry journal article supplement (doi:10.1039/c6cp01353h), 2016-01-01
Supplement: c6cp01353h1.pdf [file c6cp01353h1.pdf]

Supporting information for

## **Structural, thermal, dielectric and phonon properties of perovskite-like imidazolium magnesium formate**

*Mirosław Mączka,<sup>\*a</sup> Nathalia Leal Marinho Costa,<sup>b</sup> Anna Gągor,<sup>a</sup> Waldeci Paraguassu,<sup>b</sup> Adam Sieradzki,<sup>c</sup> and Jerzy Hanuza<sup>d</sup>*

*<sup>a</sup>Institute of Low Temperature and Structure Research, Polish Academy of Sciences, Box 1410, 50-950 Wrocław 2, Poland*

*<sup>b</sup>Faculdade de Física, Universidade Federal do Pará, 66075-110, Belém, PA, Brazil*

*<sup>c</sup>Department of Experimental Physics, Wrocław University of Technology, Wybrzeże Wyspiańskiego 27, 50-370, Wrocław, Poland*

*<sup>d</sup>Department of Bioorganic Chemistry, Faculty of Industry and Economics, Wrocław University of Economics, 118/120 Komandorska Str., 53-345 Wrocław, Poland*

e-mail: [m.maczka@int.pan.wroc.pl](mailto:m.maczka@int.pan.wroc.pl)

Table S1. Crystal data, data collection and refinement results for imidazolium magnesium formate.

|                                                                            |                                                                                                                                                                    |
|----------------------------------------------------------------------------|--------------------------------------------------------------------------------------------------------------------------------------------------------------------|
| <i>Crystal data</i>                                                        |                                                                                                                                                                    |
| Chemical formula                                                           | C <sub>6</sub> H <sub>8</sub> MgN <sub>2</sub> O <sub>6</sub>                                                                                                      |
| $M_r$                                                                      | 228.45                                                                                                                                                             |
| Crystal system, space group                                                | Monoclinic, $P2_1/n$                                                                                                                                               |
| Temperature (K)                                                            | 296                                                                                                                                                                |
| $a, b, c$ (Å)                                                              | 12.1246 (4), 12.2087 (5), 12.4991 (4)                                                                                                                              |
| $\beta$ (°)                                                                | 91.394 (3)                                                                                                                                                         |
| $V$ (Å <sup>3</sup> )                                                      | 1849.64 (12)                                                                                                                                                       |
| $Z$                                                                        | 8                                                                                                                                                                  |
| Radiation type                                                             | Mo $K\alpha$                                                                                                                                                       |
| $\mu$ (mm <sup>-1</sup> )                                                  | 0.20                                                                                                                                                               |
| Crystal size (mm)                                                          | 0.15 × 0.09 × 0.08                                                                                                                                                 |
| <i>Data collection</i>                                                     |                                                                                                                                                                    |
| Diffractometer                                                             | Xcalibur, Sapphire1, long nozzle                                                                                                                                   |
| Absorption correction                                                      | Multi-scan <i>CrysAlis PRO</i> , Agilent Technologies, Empirical absorption correction using spherical harmonics, implemented in SCALE3 ABSPACK scaling algorithm. |
| $T_{\min}, T_{\max}$                                                       | 0.981, 1.000                                                                                                                                                       |
| No. of measured, independent and observed [ $I > 2\sigma(I)$ ] reflections | 17019, 3500, 2290                                                                                                                                                  |
| $R_{\text{int}}$                                                           | 0.056                                                                                                                                                              |
| $(\sin \theta/\lambda)_{\text{max}}$ (Å <sup>-1</sup> )                    | 0.610                                                                                                                                                              |
| <i>Refinement</i>                                                          |                                                                                                                                                                    |
| $R[F^2 > 2\sigma(F^2)], wR(F^2), S$                                        | 0.046, 0.114, 1.02                                                                                                                                                 |
| No. of reflections                                                         | 3500                                                                                                                                                               |
| No. of parameters                                                          | 271                                                                                                                                                                |
| H-atom treatment                                                           | H-atom parameters constrained                                                                                                                                      |
| $\Delta\rho_{\text{max}}, \Delta\rho_{\text{min}}$ (e Å <sup>-3</sup> )    | 0.29, -0.25                                                                                                                                                        |

Computer programs: *CrysAlis PRO*, Agilent Technologies, Version 1.171.37.35h (release 09-02-2015 CrysAlis171 .NET) (compiled Feb 9 2015, 16:26:32), *SHELXL2014/7* (Sheldrick, 2014).

Table S2. Selected geometric parameters (Å, °)

|                    |             |                            |             |
|--------------------|-------------|----------------------------|-------------|
| Mg1—O2             | 2.0450 (19) | O9—C5 <sup>ii</sup>        | 1.226 (3)   |
| Mg1—O12            | 2.0512 (19) | O10—C4 <sup>iii</sup>      | 1.231 (3)   |
| Mg1—O6             | 2.0647 (19) | O11—C3 <sup>iv</sup>       | 1.216 (3)   |
| Mg1—O4             | 2.0668 (19) | O12—C2 <sup>v</sup>        | 1.225 (3)   |
| Mg1—O3             | 2.0743 (19) | C2—O12 <sup>vi</sup>       | 1.225 (3)   |
| Mg1—O5             | 2.0836 (18) | C3—O11 <sup>iv</sup>       | 1.216 (3)   |
| Mg2—O8             | 2.045 (2)   | C4—O10 <sup>iii</sup>      | 1.231 (3)   |
| Mg2—O10            | 2.0528 (19) | C5—O9 <sup>vii</sup>       | 1.226 (3)   |
| Mg2—O9             | 2.0570 (19) | C6—O8 <sup>viii</sup>      | 1.225 (3)   |
| Mg2—O7             | 2.0583 (19) | N7—C11                     | 1.295 (4)   |
| Mg2—O11            | 2.0746 (19) | N7—C8                      | 1.338 (4)   |
| Mg2—O1             | 2.0925 (19) | C8—C9                      | 1.331 (4)   |
| O1—C1              | 1.246 (3)   | C9—N10                     | 1.350 (4)   |
| O2—C6              | 1.212 (3)   | N10—C11                    | 1.295 (4)   |
| O3—C4              | 1.247 (3)   | N12—C13                    | 1.314 (4)   |
| O4—C3              | 1.243 (3)   | N12—C16                    | 1.344 (4)   |
| O5—C5              | 1.233 (3)   | C13—N14                    | 1.324 (4)   |
| O6—C1              | 1.223 (3)   | N14—C15                    | 1.335 (4)   |
| O7—C2              | 1.214 (3)   | C15—C16                    | 1.311 (4)   |
| O8—C6 <sup>i</sup> | 1.225 (3)   |                            |             |
| O2—Mg1—O12         | 95.34 (8)   | O11—Mg2—O1                 | 88.89 (8)   |
| O2—Mg1—O6          | 173.41 (8)  | C1—O1—Mg2                  | 131.05 (18) |
| O12—Mg1—O6         | 91.12 (8)   | C6—O2—Mg1                  | 137.79 (19) |
| O2—Mg1—O4          | 88.78 (8)   | C4—O3—Mg1                  | 137.28 (18) |
| O12—Mg1—O4         | 95.58 (8)   | C3—O4—Mg1                  | 133.90 (18) |
| O6—Mg1—O4          | 89.31 (8)   | C5—O5—Mg1                  | 142.37 (19) |
| O2—Mg1—O3          | 91.12 (8)   | C1—O6—Mg1                  | 132.97 (18) |
| O12—Mg1—O3         | 83.17 (8)   | C2—O7—Mg2                  | 145.0 (2)   |
| O6—Mg1—O3          | 90.93 (8)   | C6 <sup>i</sup> —O8—Mg2    | 139.4 (2)   |
| O4—Mg1—O3          | 178.73 (8)  | C5 <sup>ii</sup> —O9—Mg2   | 144.11 (19) |
| O2—Mg1—O5          | 83.97 (8)   | C4 <sup>iii</sup> —O10—Mg2 | 133.57 (18) |
| O12—Mg1—O5         | 174.55 (8)  | C3 <sup>iv</sup> —O11—Mg2  | 139.16 (19) |
| O6—Mg1—O5          | 89.72 (8)   | C2 <sup>v</sup> —O12—Mg1   | 147.60 (19) |
| O4—Mg1—O5          | 89.81 (8)   | O6—C1—O1                   | 126.2 (3)   |
| O3—Mg1—O5          | 91.43 (8)   | O7—C2—O12 <sup>vi</sup>    | 127.6 (3)   |
| O8—Mg2—O10         | 90.25 (8)   | O11 <sup>iv</sup> —C3—O4   | 127.0 (3)   |
| O8—Mg2—O9          | 93.65 (9)   | O10 <sup>iii</sup> —C4—O3  | 125.9 (3)   |
| O10—Mg2—O9         | 93.93 (8)   | O9 <sup>vii</sup> —C5—O5   | 126.2 (3)   |
| O8—Mg2—O7          | 90.46 (9)   | O2—C6—O8 <sup>viii</sup>   | 128.8 (3)   |
| O10—Mg2—O7         | 91.19 (8)   | C11—N7—C8                  | 109.7 (3)   |
| O9—Mg2—O7          | 173.42 (9)  | C9—C8—N7                   | 106.9 (3)   |
| O8—Mg2—O11         | 89.87 (8)   | C8—C9—N10                  | 105.9 (3)   |
| O10—Mg2—O11        | 179.48 (8)  | C11—N10—C9                 | 109.7 (3)   |
| O9—Mg2—O11         | 86.56 (8)   | N7—C11—N10                 | 107.7 (3)   |
| O7—Mg2—O11         | 88.31 (8)   | C13—N12—C16                | 108.8 (3)   |
| O8—Mg2—O1          | 177.05 (9)  | N12—C13—N14                | 107.3 (3)   |
| O10—Mg2—O1         | 90.97 (8)   | C13—N14—C15                | 108.5 (3)   |
| O9—Mg2—O1          | 88.95 (8)   | C16—C15—N14                | 108.0 (3)   |
| O7—Mg2—O1          | 86.82 (8)   | C15—C16—N12                | 107.4 (3)   |

Symmetry code(s): (i)  $x-1, y, z$ ; (ii)  $x-1/2, -y+1/2, z-1/2$ ; (iii)  $-x, -y+1, -z$ ; (iv)  $-x, -y, -z$ ; (v)  $x+1/2, -y+1/2, z-1/2$ ; (vi)  $x-1/2, -y+1/2, z+1/2$ ; (vii)  $x+1/2, -y+1/2, z+1/2$ ; (viii)  $x+1, y, z$ .

Table S3. Selected hydrogen-bond parameters

| $D-H\cdots A$                      | $D-H$ (Å) | $H\cdots A$ (Å) | $D\cdots A$ (Å) | $D-H\cdots A$ (°) |
|------------------------------------|-----------|-----------------|-----------------|-------------------|
| N7—H7 $\cdots$ O4 <sup>i</sup>     | 0.86      | 1.91            | 2.751 (3)       | 166.6             |
| N10—H10 $\cdots$ O3 <sup>ii</sup>  | 0.86      | 2.00            | 2.820 (3)       | 158.9             |
| C11—H11 $\cdots$ O7                | 0.93      | 2.30            | 3.111 (4)       | 145.5             |
| N12—H12 $\cdots$ O5 <sup>iii</sup> | 0.86      | 2.02            | 2.873 (3)       | 170.6             |
| N14—H14 $\cdots$ O1 <sup>iv</sup>  | 0.86      | 1.92            | 2.778 (3)       | 175.7             |
| C16—H16 $\cdots$ O8 <sup>v</sup>   | 0.93      | 2.31            | 3.176 (4)       | 155.2             |

Symmetry code(s): (i)  $x-1, y, z$ ; (ii)  $x-1/2, -y+1/2, z+1/2$ ; (iii)  $-x+1, -y+1, -z$ ; (iv)  $x+1/2, -y+1/2, z-1/2$ ; (v)  $-x, -y+1, -z$ .

Table S4. IR and Raman wavenumbers (in  $\text{cm}^{-1}$ ) of ImMg and suggested assignments.<sup>a</sup>

| Raman  | Raman                 | IR     | IR           | assignment                          |
|--------|-----------------------|--------|--------------|-------------------------------------|
| 490 K  | 300 K                 | 500 K  | 300 K        |                                     |
| 3183w  | 3190w                 |        |              | $\nu(\text{C-H})$                   |
| 3150m  | 3161m, 3151sh         | 3149w  | 3157w, 3143w | $\nu(\text{C-H})$                   |
|        | 3126w                 |        |              | $\nu(\text{N-H})$                   |
| 3030vw | 3032vw                |        |              | overtone                            |
| 2964w  | 2968w                 | 2960w  | 2968w        | $\nu(\text{N-H})$                   |
| 2852s  | 2877sh, 2863s         |        | 2860w        | $\nu_1(\text{HCOO}^-)$              |
|        |                       | 2838w  | 2830m        | $\nu(\text{N-H})$                   |
| 2829s  | 2829s                 |        |              | $\nu_1(\text{HCOO}^-)$              |
| 2710w  | 2719w, 2697w          |        |              | $2\nu_2(\text{HCOO}^-)$             |
|        |                       | 1617vs | 1613vs       | $\nu_4(\text{HCOO}^-)$              |
| 1585w  | 1588w                 |        |              | ring stretch                        |
| 1524vw | 1527vw                |        |              | ring stretch                        |
| 1443m  | 1460sh, 1451m         | 1436w  | 1459w, 1440w | $\delta(\text{N-H})$ , ring stretch |
|        | 1440sh                |        |              |                                     |
| 1392s  | 1386s, 1382sh, 1376sh | 1378m  | 1382s        | $\nu_5(\text{HCOO}^-)$              |
| 1357m  | 1353m                 | 1358s  | 1358s        | $\nu_2(\text{HCOO}^-)$              |
| 1264w  | 1271w                 |        |              | $\delta(\text{C-H})$                |

|                |               |               |              |                                                  |
|----------------|---------------|---------------|--------------|--------------------------------------------------|
| 1251w          | 1254w         |               |              | $\delta(\text{C-H})$                             |
| 1194m          | 1203m, 1186sh | 1192sh, 1181w | 1204w, 1181w | $\delta(\text{C-H})$ , ring deformation          |
| 1118w          | 1129w         | 1115vw        | 1127w, 1115w | $\delta(\text{C-H})$ , ring deformation          |
| 1098w          | 1114w, 1093w  | 1096w         | 1092w        | $\delta(\text{C-H})$ , ring deformation          |
| 1064w          | 1065w         |               |              | $\nu_6(\text{HCOO}^-)$                           |
| 1057w          | 1056w         | 1054w         | 1057w        | ring deformation                                 |
|                |               | 984sh, 953m   | 988m, 961sh  | $\gamma(\text{N-H})$ , ring deformation          |
| 910sh          | 910sh         |               | 911w         | ring deformation                                 |
| 901w           | 901w          | 899vw         | 899w         | ring deformation                                 |
|                | 881vw, 862vw  |               | 861sh        | ring deformation                                 |
|                |               | 838m          | 845m         | $\gamma(\text{N-H})$ , ring deformation          |
| 796w           | 804w, 798w    | 799s          | 802s         | $\nu_3(\text{HCOO}^-)$                           |
|                |               | 775sh         | 772w         | ring deformation                                 |
| 631sh,<br>627w | 634sh, 627w   | 629m          | 636m         | ring torsion                                     |
|                | 244w          |               |              | L(HCOO <sup>-</sup> ) and T'(HCOO <sup>-</sup> ) |
| 203m           | 205m          |               |              | L(HCOO <sup>-</sup> ) and T'(HCOO <sup>-</sup> ) |
| 157sh          | 168s          |               |              | L(HCOO <sup>-</sup> )                            |
| 137s           | 134m          |               |              | L(HCOO <sup>-</sup> )                            |
|                | 82s           |               |              | L(HCOO <sup>-</sup> )                            |

<sup>a</sup>Key: s, strong; m, medium; w, weak; vw, very weak; sh, shoulder; b, broad; Vibrations of the HCOO<sup>-</sup> ions are: C-H stretching ( $\nu_1$ ), symmetric C-O stretching ( $\nu_2$ ), antisymmetric C-O stretching ( $\nu_4$ ), symmetric O-C-O bending ( $\nu_3$ ), C-H in-plane bending ( $\nu_5$ ) and C-H out-of-plane bending ( $\nu_6$ ). Vibrations of imidazolium cation are classified as stretching ( $\nu$ ), in-plane bending ( $\delta$ ) and out-of-plane bending ( $\gamma$ ) modes of the N-H and C-H groups as well as ring stretching,

Table S5. Wavenumber intercepts at zero pressure ( $\omega_0$ ) and pressure coefficients ( $\alpha=d\omega/dP$ ), obtained from fitting of the experimental data by linear functions, for the ambient and high-pressure phases of ImMg.

| ambient pressure phase |                                       | Intermediate phase  |                                       | high-pressure phase |                                       | assignment                                       |
|------------------------|---------------------------------------|---------------------|---------------------------------------|---------------------|---------------------------------------|--------------------------------------------------|
| $\omega_0$             | $\alpha$                              | $\omega_0$          | $\alpha$                              | $\omega_0$          | $\alpha$                              |                                                  |
| (cm <sup>-1</sup> )    | (cm <sup>-1</sup> GPa <sup>-1</sup> ) | (cm <sup>-1</sup> ) | (cm <sup>-1</sup> GPa <sup>-1</sup> ) | (cm <sup>-1</sup> ) | (cm <sup>-1</sup> GPa <sup>-1</sup> ) |                                                  |
| 1459.6                 | 1.85                                  | 1460.3              | 1.64                                  | 1464.6              | 2.70                                  | $\delta$ (N-H), ring stretch                     |
| 1449.6                 | 2.51                                  | 1453.6              | 1.50                                  | 1457.6              | 2.02                                  | $\delta$ (N-H), ring stretch                     |
| 1436.6                 | 2.22                                  | 1435.3              | 2.64                                  | 1449.1              | 0.96                                  | $\delta$ (N-H), ring stretch                     |
| 1386.6                 | 3.47                                  | 1385.0              | 4.57                                  | 1389.9              | 3.34                                  | $\nu_5$ (HCOO <sup>-</sup> )                     |
| 1375.2                 | 2.13                                  | 1372.5              | 4.02                                  | 1371.8              | 4.51                                  | $\nu_5$ (HCOO <sup>-</sup> )                     |
|                        |                                       |                     |                                       | 1367.5              | 3.32                                  | $\nu_5$ (HCOO <sup>-</sup> )                     |
|                        |                                       |                     |                                       | 1377.1              | 1.62                                  | $\nu_5$ (HCOO <sup>-</sup> )                     |
|                        |                                       | 1225.9              | 2.93                                  |                     |                                       | $\delta$ (C-H), ring deformation                 |
| 1205.5                 | 2.82                                  | 1201.9              | 4.29                                  | 1204.5              | 3.98                                  | $\delta$ (C-H), ring deformation                 |
|                        |                                       |                     |                                       | 1196.0              | 2.92                                  | $\delta$ (C-H), ring deformation                 |
|                        |                                       |                     |                                       | 1187.5              | 0.91                                  | $\delta$ (C-H), ring deformation                 |
|                        |                                       |                     |                                       | 1136.2              | 3.55                                  | $\delta$ (C-H), ring deformation                 |
| 1132.6                 | 2.72                                  | 1129.2              | 3.51                                  |                     |                                       | $\delta$ (C-H), ring deformation                 |
| 1115.5                 | 2.56                                  |                     |                                       | 1099.9              | 3.35                                  | $\delta$ (C-H), ring deformation                 |
| 1090.0                 | 3.18                                  | 1077.9              | 6.23                                  | 1097.4              | 1.66                                  | $\delta$ (C-H), ring deformation                 |
|                        |                                       |                     |                                       | 1107.1              | -1.27                                 | $\delta$ (C-H), ring deformation                 |
| 1065.7                 | 1.29                                  | 1068.3              | 0.52                                  | 1072.6              | -0.77                                 | $\nu_6$ (HCOO <sup>-</sup> )                     |
| 1056.0                 | 1.10                                  |                     |                                       | 1042.2              | 0.72                                  | ring deformation                                 |
| 898.7                  | 1.45                                  | 899.1               | 1.07                                  | 895.7               | 1.60                                  | ring deformation                                 |
| 855.6                  | 2.63                                  | 860.3               | 0.86                                  | 828.1               | 5.70                                  | ring deformation                                 |
|                        |                                       |                     |                                       | 845.4               | 2.15                                  | ring deformation                                 |
| 804.7                  | 0.86                                  | 806.1               | 0.36                                  | 788.7               | 2.69                                  | $\nu_3$ (HCOO <sup>-</sup> )                     |
|                        |                                       |                     |                                       | 794.0               | -1.14                                 | $\nu_3$ (HCOO <sup>-</sup> )                     |
| 637.6                  | 0.88                                  | 632.6               | 3.43                                  |                     |                                       | ring torsion                                     |
| 625.9                  | 2.60                                  | 628.9               | 2.21                                  | 625.6               | 2.70                                  | ring torsion                                     |
|                        |                                       |                     |                                       | 621.6               | 2.03                                  | ring torsion                                     |
|                        |                                       |                     |                                       | 622.9               | 1.01                                  | ring torsion                                     |
|                        |                                       |                     |                                       | 216.8               | 12.76                                 | L(HCOO <sup>-</sup> ) and T'(HCOO <sup>-</sup> ) |

|       |      |       |       |       |       |                                                  |
|-------|------|-------|-------|-------|-------|--------------------------------------------------|
|       |      |       |       | 277.1 | 4.72  | L(HCOO <sup>-</sup> ) and T'(HCOO <sup>-</sup> ) |
|       |      |       |       | 240.8 | 6.75  | L(HCOO <sup>-</sup> ) and T'(HCOO <sup>-</sup> ) |
|       |      |       |       | 226.4 | 6.80  | L(HCOO <sup>-</sup> ) and T'(HCOO <sup>-</sup> ) |
|       |      | 198.8 | 11.02 | 199.9 | 7.82  | L(HCOO <sup>-</sup> ) and T'(HCOO <sup>-</sup> ) |
|       |      |       |       | 201.1 | 5.63  | L(HCOO <sup>-</sup> ) and T'(HCOO <sup>-</sup> ) |
| 207.9 | 1.40 | 208.3 | 1.93  | 210.4 | 2.38  | L(HCOO <sup>-</sup> ) and T'(HCOO <sup>-</sup> ) |
| 166.3 | 2.93 | 149.8 | 7.07  | 126.7 | 9.46  | L(HCOO <sup>-</sup> )                            |
|       |      | 135.6 | 6.57  | 123.9 | 8.38  | L(HCOO <sup>-</sup> )                            |
|       |      |       |       | 137.0 | 5.16  | L(HCOO <sup>-</sup> )                            |
|       |      |       |       | 167.6 | -0.27 | L(HCOO <sup>-</sup> )                            |
| 136.5 | 1.21 | 139.1 | -0.21 | 109.6 | 6.07  | L(HCOO <sup>-</sup> )                            |
|       |      |       |       | 107.2 | 2.98  | L(HCOO <sup>-</sup> )                            |
|       |      |       |       | 85.7  | 3.66  | L(HCOO <sup>-</sup> )                            |

---

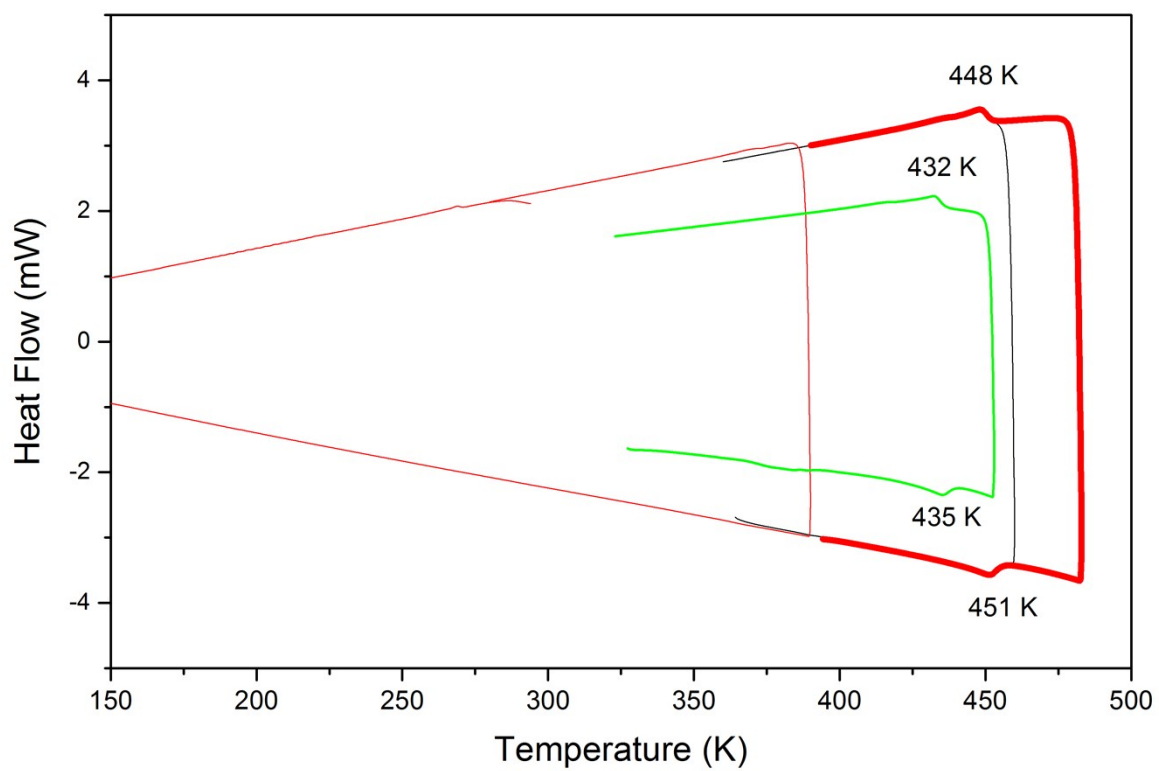

Figure S1. DSC traces for ImMg (red) and ImMn (green) in heating and cooling mode.



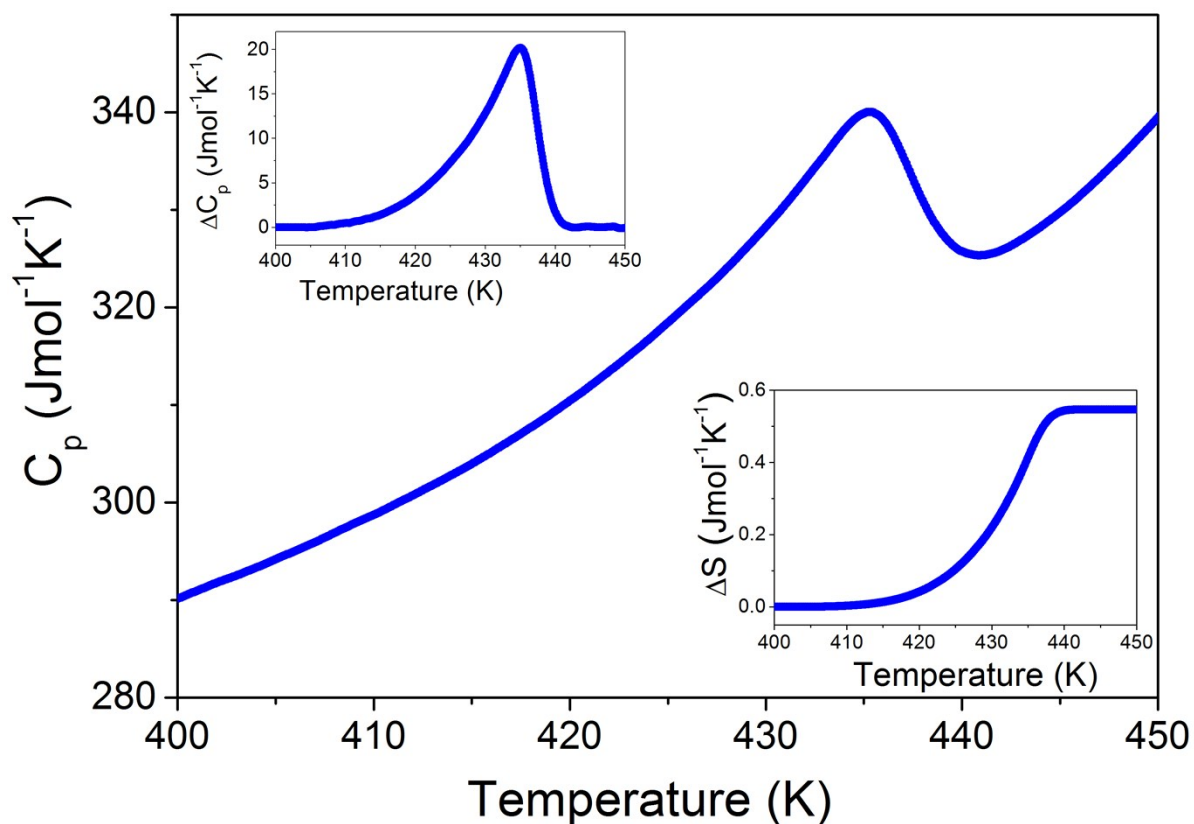

Figure S2. The heat capacity of ImMn measured in a heating mode. The estimated value of  $\Delta H$  and  $\Delta S$  is about  $\sim 235 \text{ Jmol}^{-1}$  and  $\sim 0.55 \text{ Jmol}^{-1}\text{K}^{-1}$ , respectively. Significantly smaller values of  $\Delta H$  and  $\Delta S$  ( $26.4 \text{ Jmol}^{-1}$  and  $\sim 0.073 \text{ Jmol}^{-1}\text{K}^{-1}$ , respectively) were reported previously (see F.-F. Wang, C. Chen, Y. Zhang, H.-Y. Ye, Q. Ye, D.-W. Fu, *J. Mater. Chem. C* 2015, **3**, 6350-6358.).

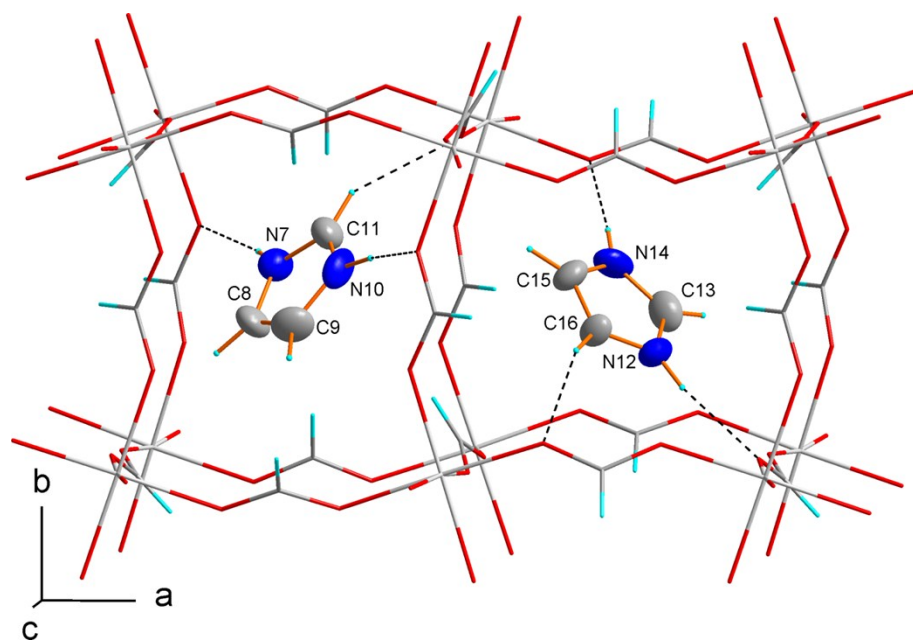

Figure S3. Two symmetry-independent imidazolium cations in the perovskite-like cavities of the  $\text{Mg}(\text{HCOO})_3^-$  framework. The dashed lines stand for the hydrogen bonds,  $T=296$  K.

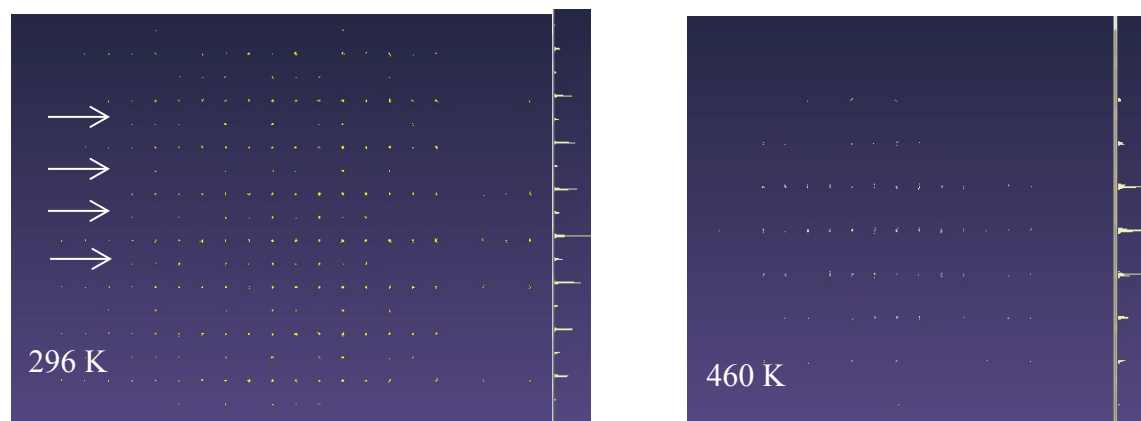

Figure S4. The reciprocal lattice of ImMg at room temperature and at 460 K. The view is along  $a^*$  axis. After the phase transition to the high-temperature phase, the  $hkl$  layers with  $l=2n+1$  (marked by the arrows) vanish indicating that the unit cell in the  $c$  direction is halved.

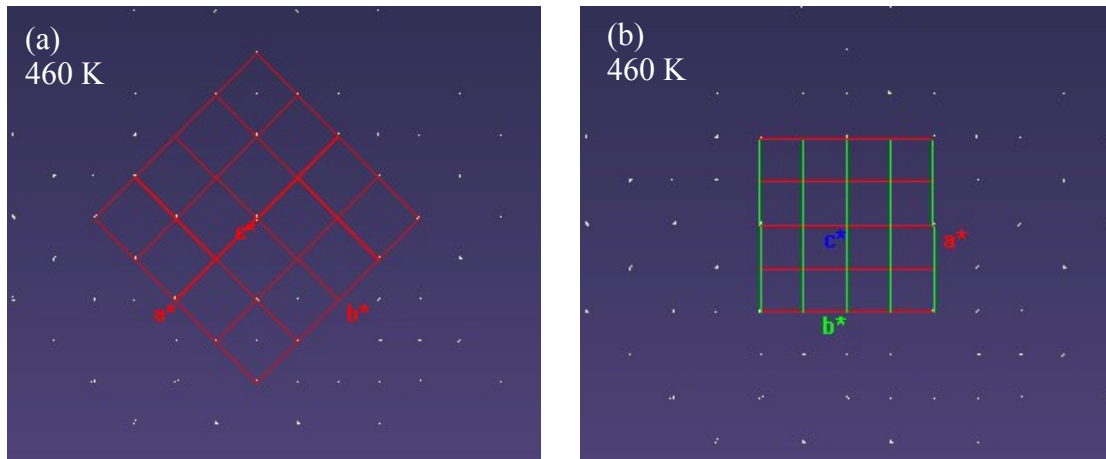

Figure S5. The reciprocal lattice of ImMg at high-temperature phase,  $T=460\text{K}$ . Two unit cell choices are presented. (a) the ‘tetragonal’ cell from Fang-Fang Wang et al. [33] (b) the monoclinic cell halved in the  $c$  direction with  $a=12.261(7)\text{ \AA}$ ,  $b=12.290(4)\text{ \AA}$ ,  $c=6.280(4)\text{ \AA}$ ,  $\beta=90.62(5)^\circ$ . The ‘tetragonal’ cell skips a number of measured diffraction peaks and the lattice parameters, especially the angles, significantly depart from the tetragonal ones:  $a=8.683(7)\text{ \AA}$ ,  $b=8.659(5)\text{ \AA}$ ,  $c=6.280(4)\text{ \AA}$ ,  $\alpha=89.60(7)^\circ$ ,  $\beta=89.48(7)^\circ$ ,  $\gamma=90.30(6)^\circ$ .

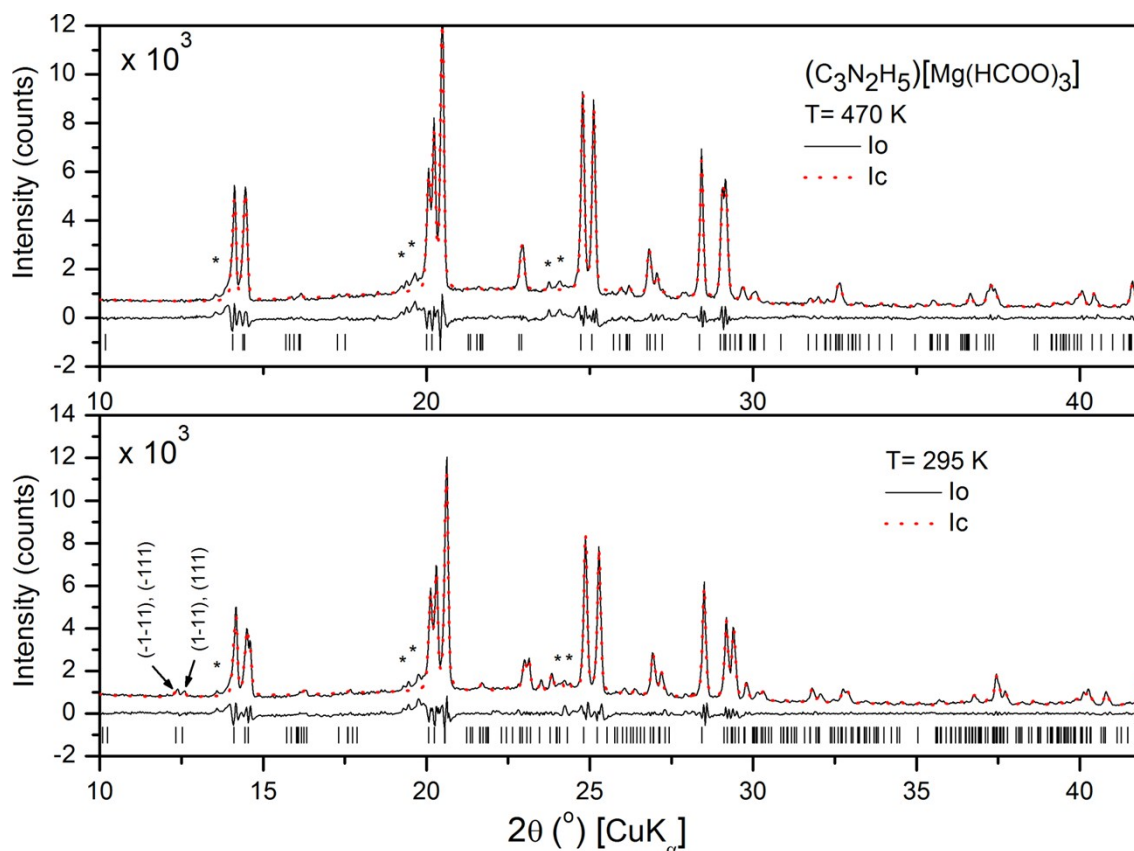

Figure S6. The results of the La Bail fit for the high (on the top) and the low-temperature phase (on the bottom) of ImMg. The obtained parameters at 470 K are:  $a=12.267(1)$  Å,  $b=12.308(1)$  Å,  $c=6.290(1)$  Å,  $\beta=91.15(1)^\circ$ ,  $V=949.6(2)$  Å<sup>3</sup>,  $GOF=2.88$   $R_p=5.98$   $wR_p=8.59$ ; the parameters for the low-temperature phase are:  $a=12.174(1)$  Å,  $b=12.259(1)$  Å,  $c=12.549(1)$  Å,  $\beta=91.40(1)^\circ$ ,  $V=1872.3(3)$  Å<sup>3</sup>,  $GOF=2.30$ ,  $R_p=5.24$ ,  $wR_p=7.57$ . The asterisks mark the impurity phase. The most evident difference between the patterns is vanishing of the (-1-11), (-111), (1-11) and (111) diffraction peaks after the phase transition signifying the reduction of the unit cell size. The fit was done using Jana2006 [Petricek, V., Dusek, M. & Palatinus, L. (2014). *Z. Kristallogr.* 229(5), 345-352.]

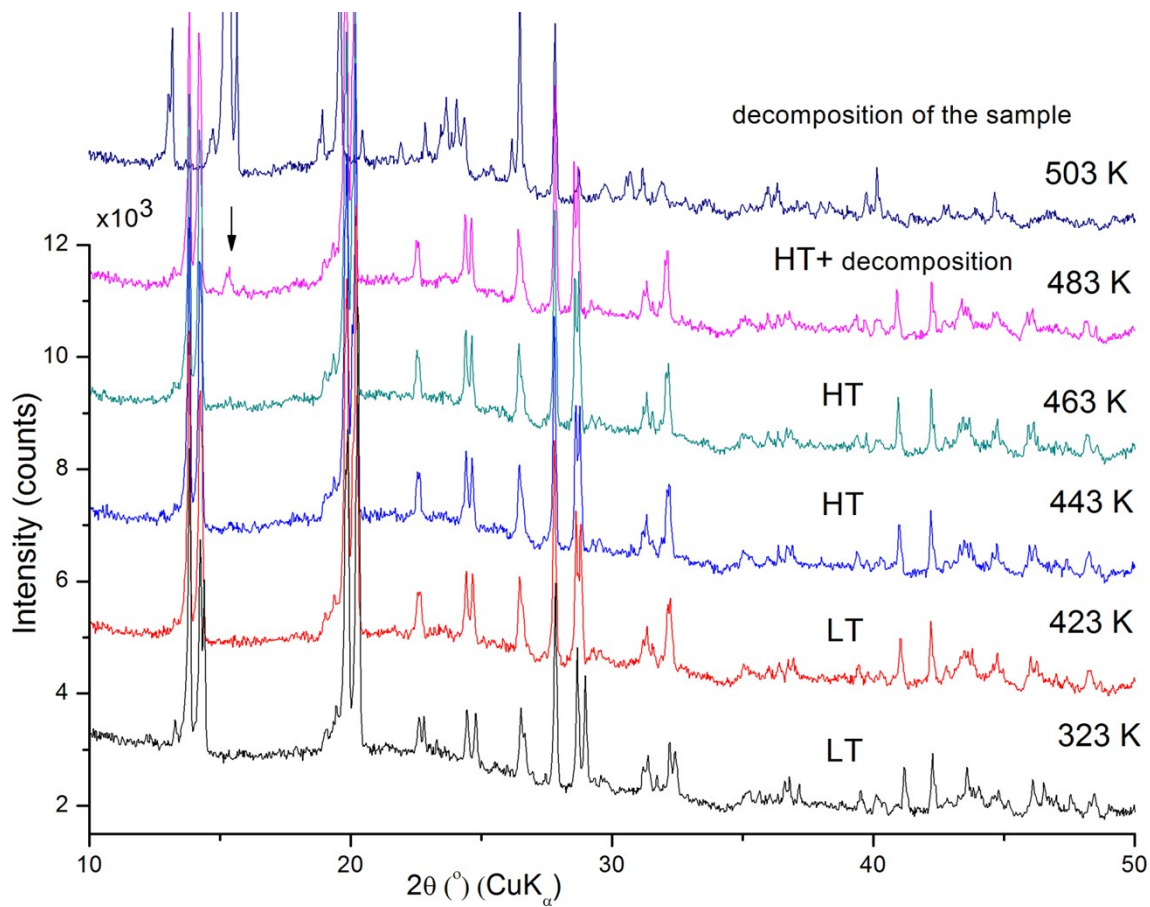

Figure S7. The x-ray diffraction patterns for ImMn. The profiles are almost identical for the high- (HT) and the low-temperature phase (LT). Any abrupt change is visible after the phase transition. The decomposition of the sample starts at 483 K; at 503 K the sample is disintegrated.

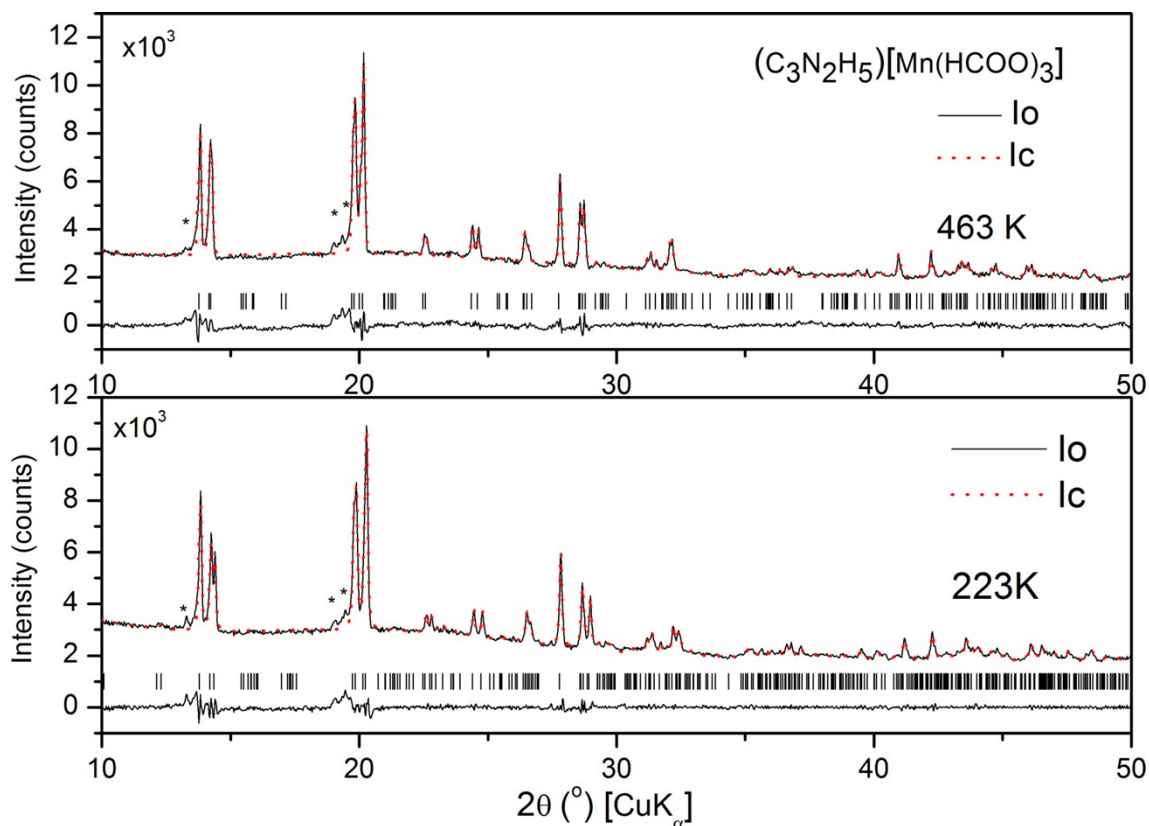

Figure S8. The results of the La Bail fit for the high (on the top) and the low-temperature phase (on the bottom) of ImMn. The obtained parameters at 463 K are:  $a=12.443(1)$  Å,  $b=12.505(1)$  Å,  $c=6.426(1)$  Å,  $\beta=90.83(1)^\circ$ ,  $V=999.7(2)$  Å<sup>3</sup>,  $GOF=1.91$   $R_p=2.53$   $wR_p=3.64$ ; the parameters for the low-temperature phase are:  $a=12.343(1)$  Å,  $b=12.469(1)$  Å,  $c=12.842(1)$  Å,  $\beta=91.15(1)^\circ$ ,  $V=1975.9(3)$  Å<sup>3</sup>,  $GOF=1.54$ ,  $R_p=1.99$ ,  $wR_p=2.95$ . The asterisks mark the impurity phase. The fit was done using Jana2006 .

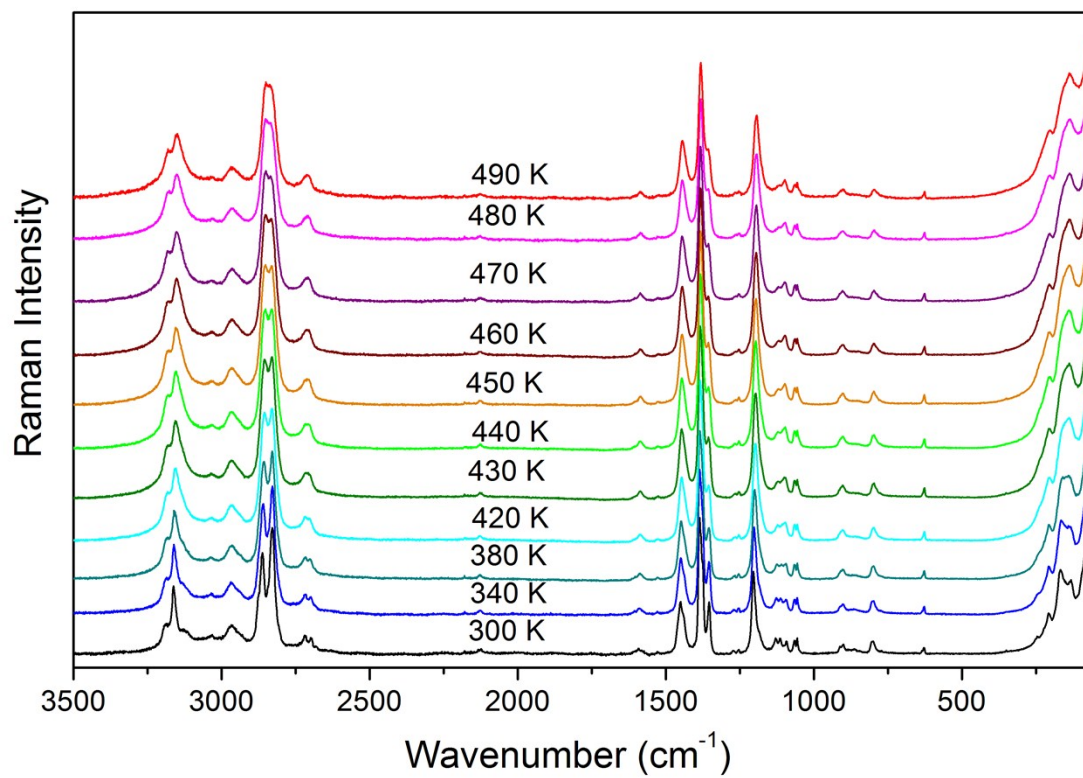

Figure S9. Raman spectra of ImMg recorded at various temperatures.



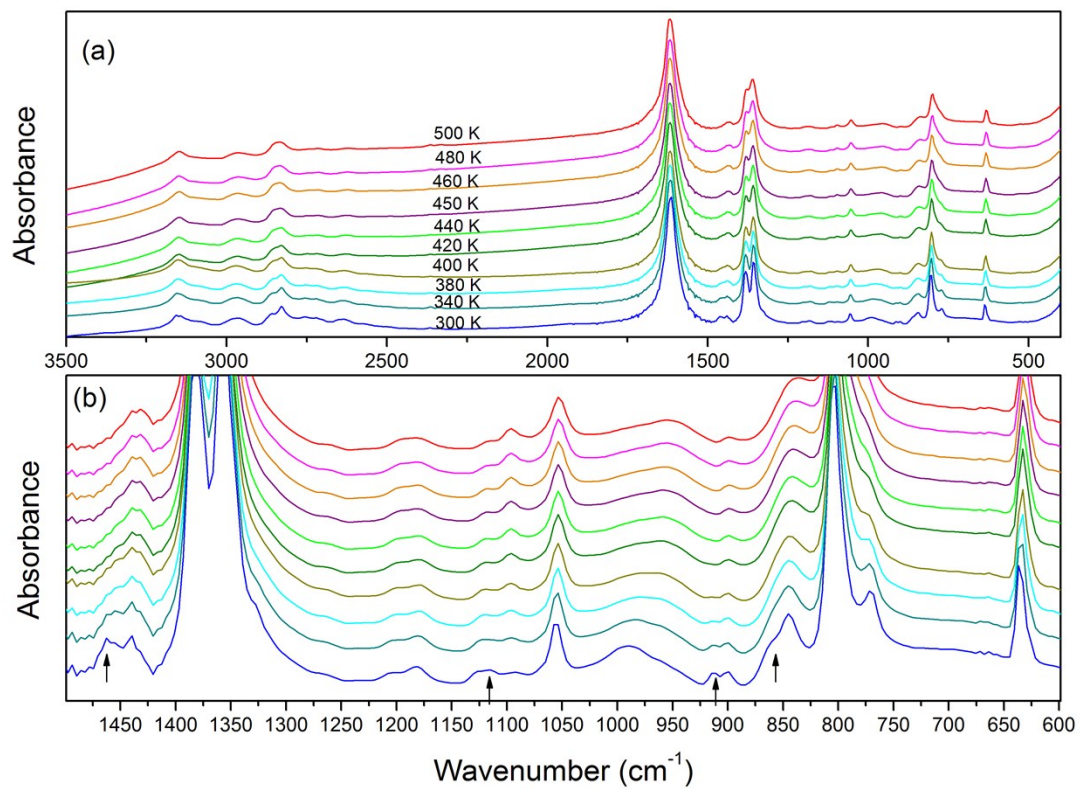

Figure S10. IR spectra of ImMg recorded at various temperatures.



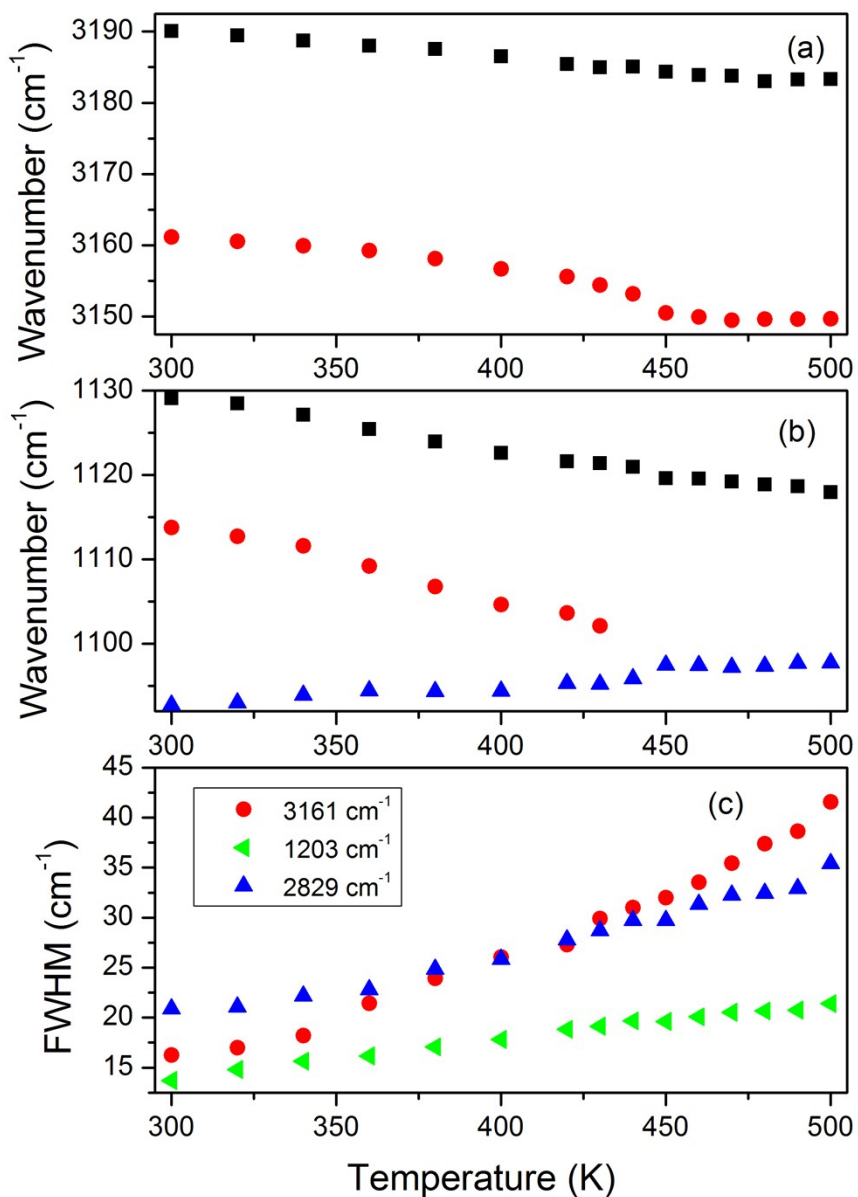

Figure S11. Temperature dependence of wave numbers for (a) the  $\nu(\text{C-H})$  and (b)  $\delta(\text{C-H})+\text{ring}$  deformation modes of imidazolium cation as well as (c) temperature dependence of FWHM values for  $1203\text{ cm}^{-1}$  (imidazolium,  $\delta(\text{C-H})+\text{ring}$  deformation),  $2829\text{ cm}^{-1}$  (formate, C-H stretching vibration  $\nu_1$ ) and  $3161\text{ cm}^{-1}$  (imidazolium,  $\nu(\text{C-H})$ ) modes.

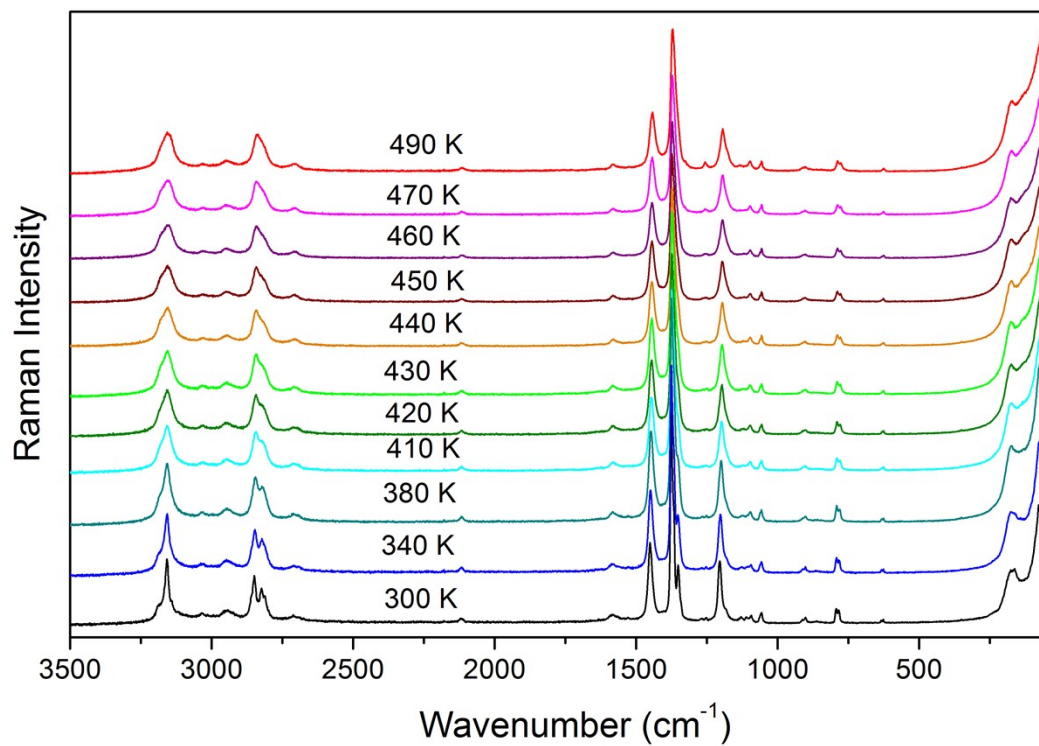

Figure S12. Raman spectra of ImMn recorded at various temperatures.

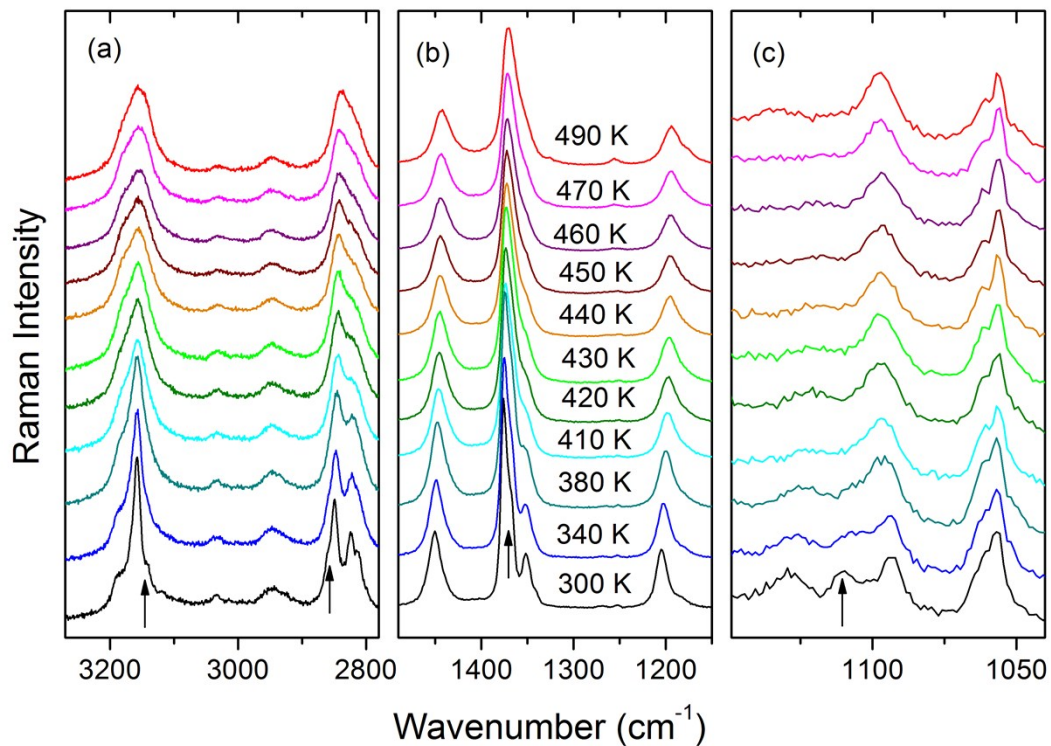

Figure S13. Detail of the Raman spectra of ImMn corresponding to the spectral ranges 2780-3270, 1150-1490 and 1040-1150  $\text{cm}^{-1}$  at different temperatures in heating run. Arrows indicate bands that disappear as a result of the phase transition.

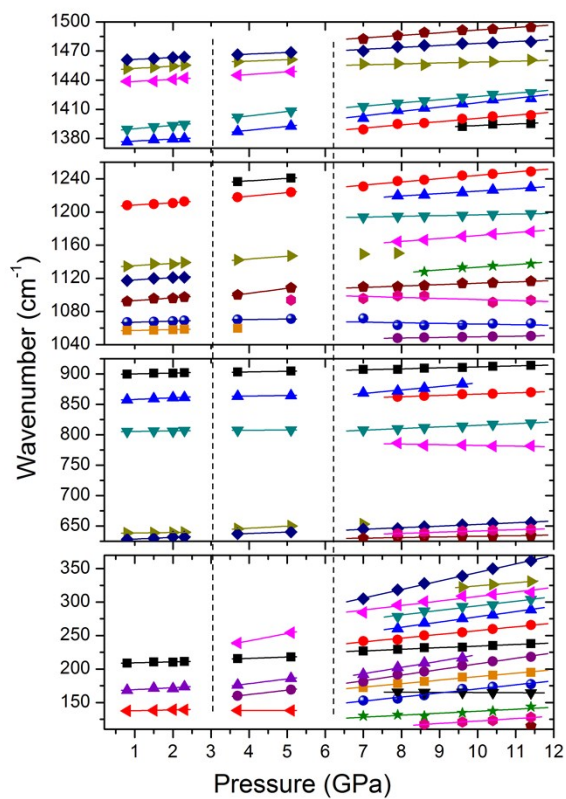

Figure S14. Wavenumber vs. pressure plots of the Raman modes observed in ImMg crystal for compression experiment. The solid lines are linear fits of the data to  $\omega(P) = \omega_0 + \alpha P$ . Vertical lines show the pressures at which structural phase transitions occur.

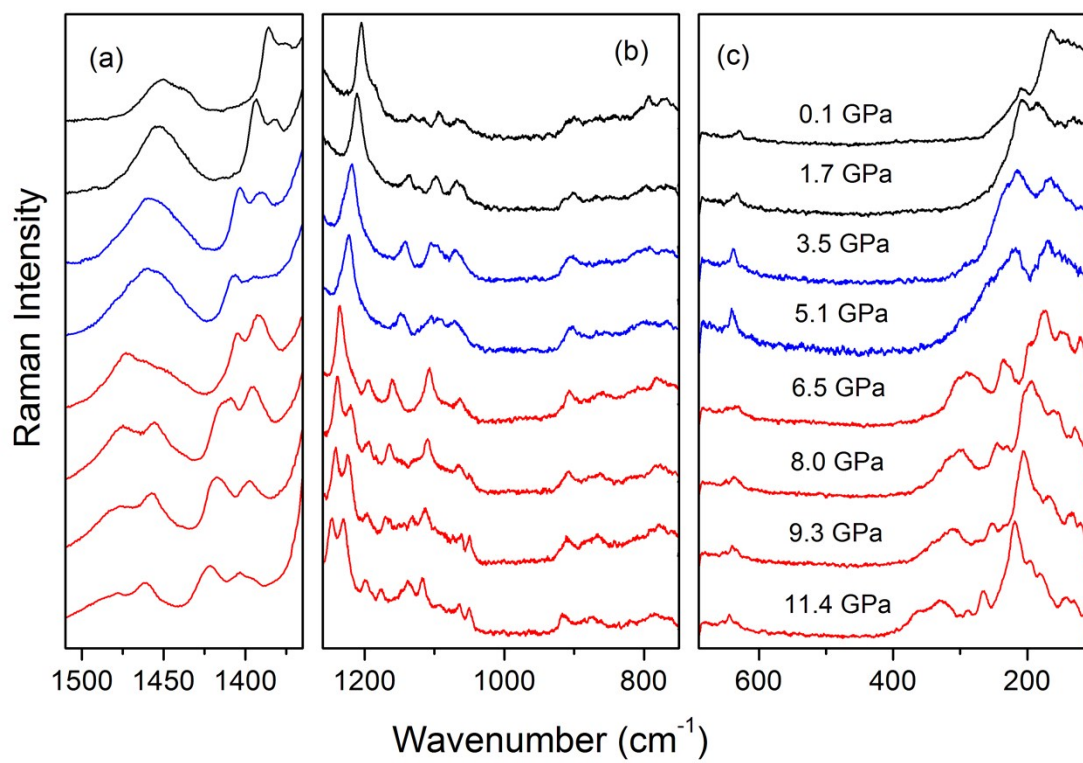

Figure S15. Raman spectra of ImMg recorded during decompression experiment.
